# Supplementary material
Source: HighWire-hosted journal article supplement (https://jnm.snmjournals.org/highwire/filestream/95107/field_highwire_adjunct_files/0/191684_Supplemental_Data.pdf)
Supplement: 191684_Supplemental_Data.pdf [file 191684_Supplemental_Data.pdf]

**Supplemental Table 1.** Biodistribution results (%IA/g±SD, n=3-6) of <sup>177</sup>Lu-OPS201 and <sup>177</sup>Lu-DOTA-TATE in nude mice bearing HEK-hsstr2 tumor xenografts, injected with 10 pmol of each radiotracer.

| <b><sup>177</sup>Lu-OPS201</b>    |           |           |            |            |             |
|-----------------------------------|-----------|-----------|------------|------------|-------------|
| <b>Organs</b>                     | <b>1h</b> | <b>4h</b> | <b>24h</b> | <b>72h</b> | <b>168h</b> |
| Blood                             | 0.29±0.03 | 0.10±0.02 | 0.03±0.01  | 0.01±0.00  | 0.00±0.00   |
| Heart                             | 0.94±0.16 | 0.61±0.09 | 0.13±0.03  | 0.07±0.01  | 0.03±0.02   |
| Lung                              | 11.5±2.10 | 6.59±3.41 | 3.01±0.77  | 1.32±1.15  | 0.44±0.32   |
| Liver                             | 3.25±1.73 | 1.45±0.33 | 0.58±0.06  | 0.32±0.06  | 0.23±0.07   |
| Pancreas                          | 49.3±0.83 | 47.0±4.20 | 20.0±6.21  | 5.53±1.21  | 2.06±0.25   |
| Spleen                            | 1.51±0.34 | 1.39±0.69 | 0.49±0.08  | 0.32±0.09  | 0.22±0.02   |
| Stomach                           | 50.0±8.32 | 49.8±8.19 | 19.2±2.49  | 9.13±2.14  | 4.73±0.93   |
| Intestine                         | 9.73±2.07 | 9.46±2.24 | 4.13±1.31  | 1.72±0.82  | 0.48±0.30   |
| Adrenal                           | 8.39±1.30 | 8.16±1.72 | 5.65±1.73  | 2.98±0.97  | 1.19±0.20   |
| Kidney                            | 7.03±0.73 | 5.88±0.85 | 4.67±0.58  | 2.18±0.26  | 0.78±0.06   |
| Muscle                            | 0.15±0.01 | 0.10±0.03 | 0.03±0.01  | 0.02±0.01  | 0.01±0.00   |
| Femur                             | 1.25±0.34 | 1.24±0.92 | 0.79±0.50  | 0.73±0.42  | 0.29±0.23   |
| Salivary gland                    | 3.80±2.13 | 2.32±0.47 | 0.55±0.17  | 0.25±0.13  | 0.15±0.06   |
| Tumor                             | 13.8±4.91 | 23.9±4.76 | 19.4±1.89  | 11.7±2.15  | 2.44±1.17   |
| <b><sup>177</sup>Lu-DOTA-TATE</b> |           |           |            |            |             |
| <b>Organs</b>                     | <b>1h</b> | <b>4h</b> | <b>24h</b> | <b>72h</b> | <b>168h</b> |
| Blood                             | 0.30±0.03 | 0.07±0.01 | 0.02±0.00  | 0.00±0.00  | 0.00±0.00   |
| Heart                             | 0.56±0.15 | 0.29±0.06 | 0.08±0.02  | 0.07±0.02  | 0.04±0.01   |
| Lung                              | 6.35±3.92 | 6.54±3.49 | 3.51±1.47  | 2.90±1.47  | 0.77±0.22   |
| Liver                             | 0.37±0.08 | 0.26±0.04 | 0.13±0.03  | 0.09±0.02  | 0.07±0.00   |
| Pancreas                          | 25.7±3.56 | 10.3±1.66 | 2.25±0.36  | 0.96±0.20  | 0.51±0.10   |
| Spleen                            | 0.80±0.10 | 0.76±0.18 | 0.30±0.07  | 0.26±0.06  | 0.12±0.03   |
| Stomach                           | 20.2±2.76 | 12.2±2.23 | 6.13±1.20  | 3.23±0.60  | 1.85±0.85   |
| Intestine                         | 6.04±1.76 | 5.80±1.20 | 2.02±0.20  | 1.81±0.35  | 0.82±0.31   |
| Adrenal                           | 7.15±1.16 | 9.27±2.49 | 3.32±0.28  | 3.42±0.78  | 2.04±0.76   |
| Kidney                            | 4.17±0.52 | 5.10±0.94 | 2.19±0.34  | 0.96±0.14  | 0.43±0.03   |
| Muscle                            | 0.46±0.53 | 0.03±0.01 | 0.04±0.03  | 0.00±0.00  | 0.00±0.00   |
| Femur                             | 0.74±0.10 | 1.55±0.36 | 0.28±0.08  | 0.61±0.14  | 0.47±0.06   |
| Salivary gland                    | 1.41±0.50 | 0.68±0.40 | 0.14±0.01  | 0.04±0.01  | 0.03±0.01   |
| Tumor                             | 12.9±2.67 | 17.8±4.35 | 6.55±0.51  | 3.66±0.54  | 0.86±0.11   |

**Supplemental Table 2.** Non-specific uptake of  $^{177}\text{Lu}$ -OPS201 and  $^{177}\text{Lu}$ -DOTA-TATE in nude mice bearing HEK-hsstr2 tumor xenografts, 2-5 min pre-injected with 2,000-fold excess (20 nmol) of OPS201 and DOTA-TATE. The biodistribution results (%IA/g $\pm$ SD, n=3) refer to 4h p.i. of the corresponding radiotracer.

| <b>Organs</b>  | <b><math>^{177}\text{Lu}</math>-OPS201</b> | <b><math>^{177}\text{Lu}</math>-DOTA-TATE</b> |
|----------------|--------------------------------------------|-----------------------------------------------|
| Blood          | 0.02 $\pm$ 0.01                            | 0.04 $\pm$ 0.00                               |
| Heart          | 0.05 $\pm$ 0.01                            | 0.02 $\pm$ 0.00                               |
| Lung           | 0.22 $\pm$ 0.06                            | 0.16 $\pm$ 0.06                               |
| Liver          | 0.31 $\pm$ 0.04                            | 0.09 $\pm$ 0.02                               |
| Pancreas       | 0.23 $\pm$ 0.10                            | 0.23 $\pm$ 0.08                               |
| Spleen         | 0.14 $\pm$ 0.03                            | 0.07 $\pm$ 0.02                               |
| Stomach        | 0.25 $\pm$ 0.02                            | 0.34 $\pm$ 0.07                               |
| Intestine      | 0.19 $\pm$ 0.03                            | 0.13 $\pm$ 0.03                               |
| Adrenal        | 0.42 $\pm$ 0.40                            | 0.51 $\pm$ 0.30                               |
| Kidney         | 7.27 $\pm$ 2.16                            | 5.63 $\pm$ 0.88                               |
| Muscle         | 0.08 $\pm$ 0.03                            | 0.02 $\pm$ 0.01                               |
| Femur          | 0.14 $\pm$ 0.03                            | 0.02 $\pm$ 0.00                               |
| Salivary gland | 0.10 $\pm$ 0.01                            | 0.04 $\pm$ 0.01                               |
| Tumor          | 5.67 $\pm$ 2.03                            | 4.68 $\pm$ 1.50                               |

**Supplemental Table 3.** Tumor-to-non tumor ratios of different injected amounts of  $^{177}\text{Lu-OPS201}$  and  $^{177}\text{Lu-DOTA-TATE}$  at 4h p.i. in nude mice bearing HEK-hsstr2 tumor xenografts.

| $^{177}\text{Lu-OPS201}$    |                |                 |                  |
|-----------------------------|----------------|-----------------|------------------|
| <b>Ratios</b>               | <b>10 pmol</b> | <b>200 pmol</b> | <b>2000 pmol</b> |
| Tumor:Blood                 | 229±22.8       | 854±126         | 1150±443         |
| Tumor:Liver                 | 16.3±4.93      | 52.1±6.69       | 80.0±7.71        |
| Tumor:Pancreas              | 1.18±0.49      | 2.03±0.81       | 17.5±8.07        |
| Tumor:Intestine             | 2.88±0.81      | 12.2±3.16       | 57.6±26.4        |
| Tumor:Kidney                | 3.93±0.46      | 3.26±0.31       | 3.17±0.19        |
| Tumor:Bone marrow           | 24.9±16.0      | 97.4±24.8       | 150±49.9         |
| Tumor:Spleen                | 16.4±6.44      | 101±7.69        | 157±21.2         |
| $^{177}\text{Lu-DOTA-TATE}$ |                |                 |                  |
| <b>Ratios</b>               | <b>10 pmol</b> | <b>200 pmol</b> | <b>2000 pmol</b> |
| Tumor:Blood                 | 255±50.5       | 325±153         | 446±136          |
| Tumor:Liver                 | 70.5±19.4      | 100±24.0        | 176±70.0         |
| Tumor:Pancreas              | 1.73±0.27      | 5.55±2.81       | 26.6±9.12        |
| Tumor:Intestine             | 3.10±0.58      | 8.13±2.45       | 43.7±17.7        |
| Tumor:Kidney                | 3.54±0.75      | 3.46±1.59       | 2.94±0.91        |
| Tumor:Bone marrow           | 12.5±5.58      | 48.7±24.6       | 163±36.7         |
| Tumor:Spleen                | 24.6±8.46      | 92.6±15.8       | 206±63.4         |

**Supplemental Table 4.** Biodistribution results (%IA/g±SD, n=6) of <sup>177</sup>Lu-OPS201 and <sup>177</sup>Lu-DOTA-TATE in nude mice bearing HEK-hsstr2 tumor xenografts, injected with 200 pmol of each radiotracer.

| <sup>177</sup> Lu-OPS201    |           |           |           |           |
|-----------------------------|-----------|-----------|-----------|-----------|
| Organs                      | 4h        | 24h       | 72h       | 168h      |
| Blood                       | 0.03±0.01 | 0.01±0.00 | 0.00±0.00 | 0.00±0.00 |
| Heart                       | 0.11±0.03 | 0.04±0.00 | 0.02±0.00 | 0.02±0.00 |
| Lung                        | 1.34±0.95 | 0.65±0.11 | 0.24±0.13 | 0.15±0.04 |
| Liver                       | 0.47±0.15 | 0.20±0.02 | 0.14±0.01 | 0.10±0.01 |
| Pancreas                    | 10.7±2.80 | 2.73±0.46 | 0.78±0.20 | 0.47±0.18 |
| Spleen                      | 0.25±0.05 | 0.12±0.02 | 0.09±0.01 | 0.09±0.02 |
| Stomach                     | 7.55±1.45 | 2.84±0.50 | 1.35±0.19 | 0.99±0.20 |
| Intestine                   | 1.96±0.38 | 0.44±0.47 | 0.55±0.06 | 0.19±0.09 |
| Adrenal                     | 1.63±0.64 | 0.47±0.11 | 0.53±0.12 | 0.15±0.06 |
| Kidney                      | 6.43±1.60 | 4.08±0.88 | 1.65±0.55 | 0.91±0.18 |
| Muscle                      | 0.03±0.01 | 0.04±0.02 | 0.01±0.01 | 0.01±0.00 |
| Femur                       | 0.31±0.15 | 0.12±0.04 | 0.06±0.04 | 0.03±0.03 |
| Salivary gland              | 0.36±0.21 | 0.07±0.01 | 0.04±0.01 | 0.03±0.06 |
| Tumor                       | 24.9±6.24 | 21.7±8.91 | 7.17±1.77 | 1.73±0.06 |
| <sup>177</sup> Lu-DOTA-TATE |           |           |           |           |
| Organs                      | 4h        | 24h       | 72h       | 168h      |
| Blood                       | 0.03±0.02 | 0.01±0.00 | 0.00±0.00 | 0.00±0.00 |
| Heart                       | 0.06±0.02 | 0.04±0.01 | 0.02±0.01 | 0.02±0.01 |
| Lung                        | 1.58±0.90 | 1.08±0.35 | 0.70±0.33 | 0.28±0.09 |
| Liver                       | 0.13±0.03 | 0.07±0.01 | 0.04±0.01 | 0.03±0.00 |
| Pancreas                    | 3.48±1.77 | 1.07±0.05 | 0.32±0.06 | 0.16±0.04 |
| Spleen                      | 0.14±0.03 | 0.11±0.03 | 0.05±0.01 | 0.04±0.01 |
| Stomach                     | 4.07±1.05 | 3.09±0.38 | 1.30±0.31 | 0.78±0.08 |
| Intestine                   | 1.59±0.30 | 0.46±0.06 | 0.82±0.12 | 0.32±0.07 |
| Adrenal                     | 2.32±1.31 | 1.74±0.30 | 1.11±0.61 | 0.57±0.11 |
| Kidney                      | 4.02±1.18 | 2.63±0.50 | 0.87±0.11 | 0.35±0.12 |
| Muscle                      | 0.02±0.01 | 0.02±0.01 | 0.01±0.01 | 0.01±0.01 |
| Femur                       | 0.23±0.18 | 0.09±0.08 | 0.03±0.04 | 0.19±0.11 |
| Salivary gland              | 0.19±0.16 | 0.06±0.02 | 0.02±0.01 | 0.01±0.00 |
| Tumor                       | 12.0±2.16 | 14.0±0.88 | 3.96±0.26 | 0.70±0.19 |
